# Supplementary material
Source: publisher figshare collection journal article supplement (https://acs.figshare.com/ndownloader/files/4466065)
Supplement: Supplementary file 1 [file 4466065]

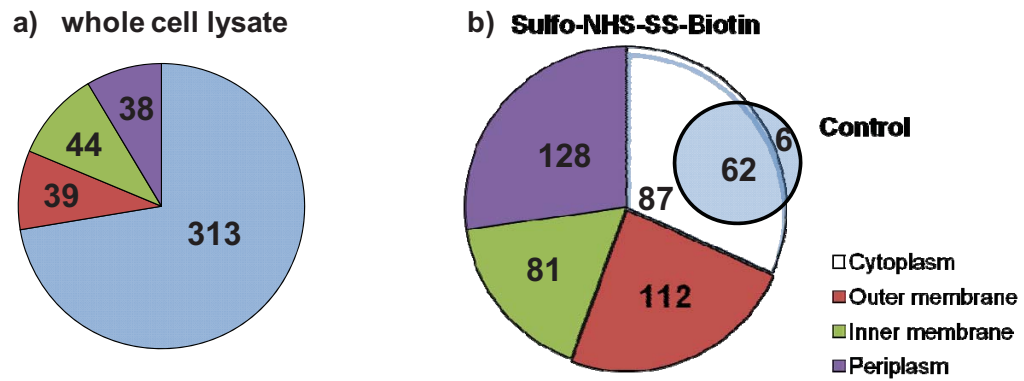

**Supplementary Figure 1.** Number of identified proteins in different subcellular localizations of a) whole cell lysate proteins and b) chemical probe labeled proteins. The sharp contrast of membrane protein percentages demonstrated the membrane proteins enrichment specificity by the chemical probe.
